1                    **Potential role of the *X* circular code in the regulation of gene expression**

2

3                    Julie D. Thompson<sup>1,\*</sup>, Raymond Ripp<sup>1</sup>, Claudine Mayer<sup>1,2,3</sup>, Olivier Poch<sup>1</sup>, Christian J. Michel<sup>1,\*</sup>

4

5                    <sup>1</sup> Department of Computer Science, ICube, CNRS, University of Strasbourg, Strasbourg, France

6                    <sup>2</sup> Unité de Microbiologie Structurale, Institut Pasteur, CNRS, 75724 Paris Cedex 15, France

7                    <sup>3</sup> Université Paris Diderot, Sorbonne Paris Cité, 75724 Paris Cedex 15, France

8

9                    Email: thompson@unistra.fr, raymond.ripp@unistra.fr, mayer@pasteur.fr, olivier.poch@unistra.fr,

10                    c.michel@unistra.fr,

11

12                    \* To whom correspondence should be addressed; Email: thompson@unistra.fr

13

14                    Keywords: gene expression; codon optimization; genetic code; circular code

15

16

## 17 **Abstract**

18 The *X* circular code is a set of 20 trinucleotides (codons) that has been identified in the protein-coding  
19 genes of most organisms (bacteria, archaea, eukaryotes, plasmids, viruses). It has been shown  
20 previously that the *X* circular code has the important mathematical property of being an error-  
21 correcting code. Thus, motifs of the *X* circular code, i.e. a series of codons belonging to *X*, which are  
22 significantly enriched in the genes, allow identification and maintenance of the reading frame in genes.  
23 *X* motifs have also been identified in many transfer RNA (tRNA) genes and in important functional  
24 regions of the ribosomal RNA (rRNA), notably in the peptidyl transferase center and the decoding center.  
25 Here, we investigate the potential role of *X* motifs as functional elements in the regulation of gene  
26 expression. Surprisingly, the definition of a simple parameter identifies several relations between the *X*  
27 circular code and gene expression. First, we identify a correlation between the 20 codons of the *X*  
28 circular code and the optimal codons/dicodons that have been shown to influence translation efficiency.  
29 Using previously published experimental data, we then demonstrate that the presence of *X* motifs in  
30 genes can be used to predict the level of gene expression. Based on these observations, we propose the  
31 hypothesis that the *X* motifs represent a new genetic signal, contributing to the maintenance of the  
32 correct reading frame and the optimization and regulation of gene expression.

33

## 34 **Author Summary**

35 The standard genetic code is used by (quasi-) all organisms to translate information in genes into  
36 proteins. Recently, other codes have been identified in genomes that increase the versatility of gene  
37 decoding. Here, we focus on the circular codes, an important class of genome codes, that have the ability  
38 to detect and maintain the reading frame during translation. Motifs of the *X* circular code are enriched  
39 in protein-coding genes from most organisms from bacteria to eukaryotes, as well as in important  
40 molecules in the gene translation machinery, including transfer RNA (tRNA) and ribosomal RNA (rRNA).  
41 Based on these observations, it has been proposed that the *X* circular code represents an ancestor of the  
42 standard genetic code, that was used in primordial systems to simultaneously decode a smaller set of  
43 amino acids and synchronize the reading frame. Using previously published experimental data, we  
44 highlight several links between the presence of *X* motifs in genes and more efficient gene expression,

45 supporting the hypothesis that the *X* circular code still contributes to the complex dynamics of gene  
46 regulation in extant genomes.

47

## 48 **Introduction**

49 Codes are ubiquitous in genomes: for example, the genetic code [1], the nucleosome positioning code  
50 [2], the histone code [3], the splicing code [4], mRNA degradation code [5], or the ‘codon usage’ code [6],  
51 to name but a few. The standard genetic code [1] is probably the most well-known genome code, and  
52 represents one of the greatest discoveries of the 20th century. All known life on Earth uses the (quasi-  
53 )same triplet genetic code to control the translation of genes into functional proteins. The fact that there  
54 are 64 possible nucleotide triplet combinations but only 20 amino acids to encode, means that the  
55 genetic code is redundant and most amino acids are encoded by more than one codon. This redundancy  
56 allows for the encoding of supplementary information in addition to the amino acid sequence [7-9], and  
57 significant efforts have been applied recently to understand the multiple layers of information or ‘codes  
58 within the code’ [10] that can be exploited to increase the versatility of genome decoding.

59 Here, we focus on an important class of genome codes, called the circular codes, first introduced by  
60 Arquès and Michel [11] and reviewed in [12,13]. In coding theory, a circular code is also known as an  
61 error-correcting code or a self-synchronizing code, since no external synchronization is required for  
62 reading frame identification. In other words, circular codes have the ability to detect and maintain the  
63 correct reading frame. For example, comma-free codes are a particularly efficient subclass of circular  
64 codes, where the reading frame is detected by a single codon. The genetic code was originally proposed  
65 to be a comma-free code in order to explain how a sequence of codons could code for 20 amino acids,  
66 and at the same time how the correct reading frame could be retrieved and maintained [14]. However,  
67 it was later proved that the modern genetic code could not be a comma-free code [15], when it was  
68 discovered that *TTT*, a codon that cannot belong to a comma-free code, codes for phenylalanine. Other  
69 circular codes are less restrictive than comma-free codes, as a frameshift of 1 or 2 nucleotides in a  
70 sequence entirely consisting of codons from a circular code will not be detected immediately but after  
71 the reading of a certain number of nucleotides.

72 By excluding the four periodic codons {*AAA,CCC,GGG,TTT*} and by assigning each codon to a preferential  
73 frame (i.e. each codon is assigned to the frame in which it occurs most frequently), a circular code was  
74 identified in the reading frame of protein coding genes from eukaryotes and prokaryotes [11,16]. This  
75 so-called *X* circular code consists of 20 codons (Fig 1):

76  $X = \{AAC, AAT, ACC, ATC, ATT, CAG, CTC, CTG, GAA, GAC, GAG, GAT, GCC, GGC, GGT, GTA, GTC, GTT, TAC, TTC\}$

77 and codes for the following 12 amino acids (three and one letter notation):

78  $\{Ala, Asn, Asp, Gln, Glu, Gly, Ile, Leu, Phe, Thr, Tyr, Val\}$

79  $= \{A, N, D, Q, E, G, I, L, F, T, Y, V\}$ .

80 Other circular codes, and notably variations of the common *X* circular code, are hypothesized to exist in  
81 different organisms [16-18].

82

83 Fig 1. Circular representation of the genetic code, adapted from [19], with the 20 codons of the *X* circular  
84 code shown on the circumference. The numbers after the nucleotides indicate their position in the  
85 codon. *X* codons that are complementary to each other are highlighted in the same color.

86

87 The *X* circular code has important mathematical properties, in particular it is self-complementary [11],  
88 meaning that if a codon belongs to *X* then its complementary trinucleotide also belongs to *X*. Like the  
89 comma-free codes, the *X* circular code also has the property of synchronizability. It has been shown that,  
90 in any sequence generated by the *X* circular code, at most 13 consecutive nucleotides are enough to  
91 always retrieve the reading frame [11]. In other words, any sequence 'motif' containing 4 consecutive *X*  
92 codons is sufficient to determine the correct reading frame (Fig 2) and [20]. More formal definitions of  
93 the mathematical properties (theorems) of the *X* circular code are available in a number of reviews [12-  
94 13,21].

95

96 Fig 2. Retrieval of the reading frame in a *X* motif constructed with the *X* circular code. Codons belonging  
97 to the *X* circular code are indicated in blue, while non-*X* codons are shown in red. Among the three  
98 possible frames, only the reading frame 0 contains codons of the *X* circular code exclusively.

99

100 The hypothesis of the *X* circular code in genes is supported by evidence from several statistical analyses  
101 of modern genomes. We previously showed in a large-scale study of 138 eukaryotic genomes that *X*  
102 motifs (defined as series of at least 4 codons from the *X* circular code) are found preferentially in protein-  
103 coding genes compared to non-coding regions with a ratio of ~8 times more *X* motifs located in genes  
104 [22]. More detailed studies of the complete gene sets of yeast and mammal genomes confirmed the  
105 strong enrichment of *X* motifs in genes and further demonstrated a statistically significant enrichment  
106 in the reading frame compared to frames 1 and 2 ( $p$ -value $<10^{-10}$ ) [23-24]. In addition, it was shown that  
107 most of the mRNA sequences from these organisms (e.g. 98% of experimentally verified genes in *S.*  
108 *cerevisiae*) contain *X* motifs. Intriguingly, conserved *X* motifs have also been found in many tRNA genes  
109 [25], as well as in important functional regions of the 16S/18S ribosomal RNA (rRNA) from bacteria,  
110 archaea and eukaryotes [26-27], which suggest their involvement in universal gene translation  
111 mechanisms. More recently, a circular code periodicity 0 modulo 3 was identified in the 16S rRNA,  
112 covering the region that corresponds to the primordial proto-ribosome decoding center and containing  
113 numerous sites that interact with the tRNA and messenger RNA (mRNA) during translation [20].  
114 Based on these observations, it has been proposed that the *X* circular code represents an ancestor of the  
115 modern genetic code that was used to code for a smaller number of amino acids and simultaneously  
116 identify and maintain the reading frame [27]. Intriguingly, the theoretical minimal RNA rings, short  
117 RNAs designed to code for all coding signals without coding redundancy among frames, are also biased  
118 for codons from the *X* circular code [28]. These RNA rings attempt to mimic primitive tRNAs and  
119 potentially reflect ancient translation machineries [29-30]. The question remains of whether the *X*  
120 motifs observed in modern genes are simply a vestige of an ancient code that might have existed in the  
121 early stages of cellular life, or whether they still play a role in the complex translation systems of extant  
122 organisms.

123 In this work, we define a (very) simple density parameter representing the coverage of the *X* circular  
124 code or the *X* motifs in genes. Unexpectedly, this parameter identifies several relations between the *X*  
125 circular code and translation efficiency and/or kinetics. We first investigate whether a correlation exists  
126 between the *X* circular code and the 'optimal' codons/dicodons associated with increased gene  
127 translation efficiency and mRNA stability. Then, we examine the recent evidence resulting from high-

128 throughput technologies such as ribosome profiling, and demonstrate that the presence of  $X$  motifs in  
129 genes can be used as a predictor of gene expression level. Taken together, these observations provide  
130 evidence supporting the idea that motifs from the  $X$  circular code represent a new genetic signal,  
131 participating in the maintenance of the correct reading frame and the optimization and regulation of  
132 gene expression.

133

## 134 **Results**

135 In this section, we first compare the 20 codons of the  $X$  circular code with the optimal codons and  
136 dicodons that have been shown to influence translation efficiency. Then, using previously published  
137 experimental data, we investigate whether a correlation exists between the presence of  $X$  motifs in genes  
138 and the level of gene expression.

139

### 140 **$X$ codons correlate with optimal codons**

141 We compared the 20 codons that belong to the  $X$  circular code with the ‘codon optimality code’ resulting  
142 from various statistical and experimental studies in metazoan [31], as well as in *S. cerevisiae* [32]. In  
143 these studies, the codon stabilization coefficient (CSC) was used as a robust and conserved measure of  
144 how individual codons contribute to shape mRNA stability and translation efficiency. Fig 3 shows the  
145 mean ranking of optimal codons, according to the CSC score, from four different experiments (in *S.*  
146 *cerevisiae*, zebrafish, *Xenopus* and *Drosophila*), where the highest ranking codon is the most optimal one.  
147 The  $X$  codons are ranked significantly higher than non- $X$  codons (i.e. the 41 coding codons which do not  
148 belong to the circular code  $X$ ), according to a Mann-Whitney signed rank test ( $z$ -score = 4.3,  $p$ -value <  
149 0.00001). In other words, optimal codons for mRNA stability and elongation rate are significantly  
150 enriched in  $X$  codons.

151

152 Fig 3. Optimal codons for translation elongation rate and mRNA stability in different eukaryotic species  
153 (*S. cerevisiae*, zebrafish, *Xenopus* and *Drosophila*). Codons are ordered according to their mean ranking  
154 obtained in four different experiments. Codons belonging to the  $X$  code are identified by a blue star.

155

156 **X codons correlate with the dicodons associated with increased expression**

157 In recent years, emerging evidence has shown that translational rates may be encoded by dicodons  
 158 rather than single codons [33-35]. For example, a large-scale screen in *S. cerevisiae* [33] assessed the  
 159 degree to which codon context modulates eukaryotic translation elongation rates beyond effects seen  
 160 at the individual codon level. The authors screened yeast cell populations housing libraries containing  
 161 random sets of triplet codons within an ORF encoding superfolder Green Fluorescent Protein (GFP).  
 162 They found that 17 dicodons were strongly associated with reduced GFP expression, i.e. associated with  
 163 a substantial reduction of the translation elongation rate. This set included the known inhibitory  
 164 dicodon *CGA-CGA* and was enriched for codons decoded by wobble interactions. Of these 17 dicodons  
 165 associated with slower translation elongation rates, none are composed of 2 X codons (Table 1).

166

| Dicodons associated with low abundance |                 | Dicodons associated with high abundance |                |
|----------------------------------------|-----------------|-----------------------------------------|----------------|
| Gamble                                 | Diambra         | Diambra                                 |                |
| AGG-CGA                                | AAA-ATA         | <b>AAC-AAC</b>                          | <b>GAC-ACC</b> |
| AGG-CGG                                | <b>AAT</b> -GCA | <b>AAC-AAG</b>                          | <b>GAC-TAC</b> |
| ATA-CGA                                | <b>AAT</b> -TGG | <b>AAC-ACC</b>                          | <b>GAT-GCT</b> |
| ATA-CGG                                | AGT-AAG         | AAG-TCC                                 | <b>GCC-AAC</b> |
| CGA-ATA                                | AGT-GTG         | <b>ACC-AAC</b>                          | <b>GCC-AAG</b> |
| CGA-CCG                                | ATA- <b>GGT</b> | <b>ACC-AAG</b>                          | <b>GCC-ACC</b> |
| CGA-CGA                                | <b>ATT</b> -AAA | <b>ACC-ACC</b>                          | <b>GCC-ATC</b> |
| CGA-CGG                                | CAA-AGT         | <b>ACC-ATC</b>                          | <b>GCC-GCC</b> |
| CGA- <b>CTG</b>                        | <b>CAG</b> -AAA | <b>ACC-ATT</b>                          | <b>GGT-GTC</b> |
| CGA-GCG                                | <b>GAA</b> -AGT | <b>ACC-GCC</b>                          | <b>GTC-AAG</b> |
| <b>CTC</b> -CCG                        | <b>GAA</b> -CTA | <b>ACC-TTC</b>                          | <b>GTC-ACC</b> |
| <b>CTG</b> -ATA                        | GCA-TTT         | <b>ATC-AAC</b>                          | <b>GTC-ATC</b> |
| <b>CTG</b> -CCG                        | TAT-AAA         | <b>ATC-AAG</b>                          | <b>GTT-GCC</b> |
| <b>CTG</b> -CGA                        | TAT-CCG         | <b>ATC-ACC</b>                          | <b>TAC-AAC</b> |
| <b>GTA</b> -CCG                        | TTT- <b>CAG</b> | <b>ATC-ATC</b>                          | <b>TAC-AAG</b> |
| <b>GTA</b> -CGA                        | TTT-TTT         | <b>ATT-GCC</b>                          | <b>TCC-ACC</b> |
| GTG-CGA                                |                 | CCA-CCA                                 | <b>TTC-AAC</b> |
|                                        |                 | CGT-CGT                                 | <b>TTC-AAG</b> |
|                                        |                 | <b>GAC-AAC</b>                          | <b>TTC-ACC</b> |
|                                        |                 | <b>GAC-AAG</b>                          | <b>TTC-ATC</b> |

167 Table 1. Dicodons enriched in low or high abundance proteins, in two different studies: Gamble [33] and  
 168 Diambra [34]. X codons are highlighted in blue.

169

170 A subsequent statistical analysis of coding sequences of nine organisms [34] identified dicodons with  
171 significant different frequency usage for coding either lowly or highly abundant proteins. The working  
172 hypothesis was that sequences encoding abundant proteins should be optimized, in the sense of  
173 translation efficiency. 16 dicodons were identified with a preference for low abundance proteins, while  
174 40 dicodons presented a preference for high abundance proteins. None of the 16 dicodons associated  
175 with low abundance proteins are composed of 2  $X$  codons (Table 1). In contrast, 27 of the 40 dicodons  
176 associated with high abundance proteins correspond to 2  $X$  codons, and only 3 dicodons do not contain  
177 any  $X$  codons (Table 1).

178 These recent studies support the idea that codons in coding sequences are likely arranged in an  
179 organized way, and that the local sequence context contributes to the effects of codon usage bias on gene  
180 regulation. Strikingly, our observations support the hypothesis that codon context may be linked in  
181 some way to the  $X$  circular code. In the next section, we describe more detailed analyses that test this  
182 hypothesis further.

183

#### 184 **$X$ motifs are enriched in the minimal gene set**

185 Based on the increasing evidence of the importance of codon context [35-39], we hypothesized that if  
186 the  $X$  circular code plays a role in gene regulation, then we might expect to see a non-random use, or  
187 ‘clusters’, of  $X$  codons along the length of the gene. In previous work [23-24], we defined an  $X$  motif as a  
188 series of consecutive  $X$  codons (of length at least 4 codons in order to always retrieve the reading frame,  
189 see also Materials and Methods) in a gene sequence and searched for such  $X$  motifs in the reading frames  
190 of different genes. This approach allowed us to demonstrate that the reading frames of genes in yeasts  
191 and in mammals are significantly enriched in such  $X$  motifs. To test the hypothesis that the  $X$  motifs  
192 represent a more universal signature, we analyzed a set of 81 genes that were previously defined as a  
193 ‘minimal gene set’ [40]. At that time, the ‘minimal gene set’ genes were found to be conserved in all  
194 species. We used the *Mycoplasma genitalium* genes provided in the original study, as well as 15,822  
195 orthologous sequences (5503 eukaryotes, 9205 bacteria and 1114 archaea), and identified all  $X$  motifs  
196 in the reading frame with a minimum length of 4 codons. Fig 4 shows the density  $d_S(X)$  (defined in  
197 Equation (1)) of the  $X$  motifs in the mRNA sequences. To evaluate the significance of the enrichment, as



198 in previous work [23-24], we used a randomization model in which we generated  $N=100$  random codes  
199 that preserved most of the properties to the  $X$  code, except the circularity. We then identified all random  
200 motifs from the 100 random codes and calculated mean values for the 100 codes.

201

202 Fig 4. Number of  $X$  motifs (per kilobase; density  $d_S(X)$  defined in Equation (1)) in the mRNA sequences  
203 of the 'minimal gene set'. The distributions of the number of  $X$  motifs identified in the sequences from  
204 the three domains of life are indicated by boxplots representing the mean number with a  $\pm 0.99$   
205 confidence interval. The distributions of the number of  $R$  random motifs (see Materials and Methods)  
206 identified in the same sequences are shown for statistical evaluation. There is a very strong statistical  
207 significance as confirmed by a one-sided Student's  $t$ -test with a  $p$ -value  $p < 10^{-100}$  for each set of  
208 sequences from archaea, bacteria and eukaryota.

209

210

211 The density of  $X$  motifs found in the minimal gene set sequences belonging to the three domains of life,  
212 is significantly higher than the density of random motifs according to a one-sided Student's  $t$ -test ( $p <$   
213  $10^{-100}$ ) for each set of sequences from archaea, bacteria and eukaryota. This study demonstrates that  $X$   
214 motifs are significantly enriched in the minimal gene set, and seem to be a universal feature of gene  
215 sequences in all three domains of life.

216

### 217 **$X$ motifs are enriched in codon-optimized genes**

218 If  $X$  motifs modify the codon usage in favor of optimal codons for translational efficiency, then we would  
219 expect that increasing the number of  $X$  motifs in a gene would increase the expression level. In an  
220 indirect way, we have shown that this is indeed the case. We previously showed that synthetic genes,  
221 which were re-designed for optimized protein expression, generally have more  $X$  motifs [24]. S1A Fig  
222 shows an example of the protein L1h from human papillomavirus (HPV-16), optimized for expression  
223 in mammalian cell lines and leading to significantly increased expression [41]. Here, the wild type gene  
224 contains only 3  $X$  motifs, while the optimized gene construct has a total of 21  $X$  motifs. It is important to  
225 note that classical codon optimization strategies do not always increase protein expression levels. S1B

226 Fig shows another example involving the L1s protein from human papillomavirus (HPV-11) optimized  
227 for expression in the potato *Solanum tuberosum* [42]. In this case, only a low level of L1 expression was  
228 observed for the codon-optimized gene. In this example, we did not observe a significant difference  
229 between the number of  $X$  motifs in the wild type and optimized sequences (5  $X$  motifs in the wild type  
230 gene compared to 4 in the optimized construct).

231 Codon replacement strategies have also been applied to the design of attenuated viruses, although in  
232 this case frequent codons are replaced with rare ones. Using quantitative proteomics and RNA  
233 sequencing, the molecular basis of attenuation in a strain of bacteriophage T7 (*Escherichia coli* K-12)  
234 was investigated [43]. The authors engineered the *E. coli* major capsid protein gene (gene 10A) to carry  
235 different proportions of suboptimal, rare codons. Transcriptional effects of the recoding were not  
236 observed, but proteomic observations revealed that translation was halved for the completely recoded  
237 major capsid gene, with subsequent effects on virus fitness (measured as doublings/hour). We obtained  
238 the sequences with 10%, 20%, 30% and 50% recoding from [44] and identified the density  $d_S(X)$   
239 (defined in Equation (1)) of  $X$  motifs in each construct. Fig 5 clearly shows the correlation between the  
240 fitness obtained for each recoded sequence and the density of  $X$  motifs observed. The authors suggested  
241 that recoding of gene 10A reduced capsid protein abundance probably by ribosome stalling rather than  
242 ribosome fall-off.

243

244 Fig 5. Histogram of the number of  $X$  motifs (per kilobase; density  $d_S(X)$  defined in Equation (1)) in the  
245 recoded version of the gene 10A from *Escherichia coli* K-12, compared to the wild type sequence. The  
246 orange plot indicates the viral fitness values corresponding to each construct.

247

248 In general, codon optimization is a successful strategy for improving protein expression in heterologous  
249 systems. However, simply replacing all rare codons by frequent codons can have negative effects *in vivo*  
250 [45]. Rare codons have the potential to slow down the translation elongation rate, due to the relatively  
251 long dwell time of the ribosome while searching for rare tRNAs. Several studies have suggested that  
252 gene-wide codon bias in favor of slowly translated codons serves as a regulatory means to obtain low  
253 expression levels of protein when desired, for example, in the case of regulatory genes, or where excess

254 of the protein may be detrimental or lethal to the cell. An example, in *Neurospora crassa*, demonstrated  
255 that codon optimization of the central clock protein FRQ actually abolished circadian rhythms [46].  
256 Different optimized constructs of the wild type gene *frq* were used in the study, where either the N-  
257 terminal end (codons 1-164) or the middle region (codons 185-530) was optimized. All optimized  
258 constructs gave higher levels of FRQ protein, this led to a different structural conformation. The density  
259 of  $X$  motifs (defined in Equation (1)) identified in the different wild type and optimized constructs is  
260 shown in Table 2. As in the previous examples, the optimized constructs contain significantly more  $X$   
261 motifs (for instance, density of 10.2 in the N-terminal end of the fully optimized construct compared to  
262 4.1 in the wild type). This example shows how non-optimal codon usage, and the associated reduction  
263 in the number of  $X$  motifs, can be used *in vivo* to regulate protein expression and to achieve optimal  
264 protein structure and function.

265

| Region                | <i>frq</i> construct | Nb of $X$ motifs (per kilobase) |
|-----------------------|----------------------|---------------------------------|
| N-terminal<br>(1-164) | wild type            | 4.1                             |
|                       | mid opt              | 6.1                             |
|                       | full opt             | 10.2                            |
| Middle<br>(185-530)   | wild type            | 3.9                             |
|                       | full opt             | 5.8                             |

266 Table 2. Comparison of  $X$  motifs (per kilobase; density  $d_S(X)$  defined in Equation (1)) in the wild type  
267 gene *frq* and different optimized constructs for the *Neurospora crassa* FRQ protein. In the ‘mid opt’  
268 constructs, only the non-preferred codons were changed; for ‘full opt’ constructs, every codon was  
269 optimized.

270

271 In nature, the translation efficiency of a gene may vary at different conditions, cell types and tissues [47-  
272 50]. Thus, it has been proposed that the codon optimization should take into account other factors in  
273 addition to replacing rare codons by frequent ones, a process termed ‘codon harmonization’ [51-53].  
274 Taken together, the examples described above suggest that it may be important for such harmonization  
275 strategies to consider the effect of codon replacement on the insertion or deletion of  $X$  motifs.

276

277  **$X$  motifs correlate with translation efficiency and mRNA stability**

278 We have shown previously that the reading frames of genes in *S. cerevisiae* are significantly enriched in  
279 *X* motifs [16]. Since then, ribosomal profiling has enabled a more detailed study of translation efficiency  
280 for a large set of 5450 genes from this organism [54]. A central assumption of ribosome profiling is that  
281 indirect measurement of the kinetics of translation *via* ribosome footprint occupancy on transcripts is  
282 directly reflective of true protein synthesis. The authors thus estimated the average translation rate of  
283 each gene, using experimental measurements of ribosome occupancy. Again, we identified the *X* motifs  
284 in the complete set of 5450 genes and calculated the density of *X* motifs (defined in Equation (1)) in  
285 three subsets of the genes having different estimated translation rates (Fig 6). We observed that genes  
286 with higher translation rates had significantly more *X* motifs than those with lower translation rates.  
287 The density of *X* motifs is higher for the sequences with medium translation rates than for those with  
288 low translation rates (one-sided Student's t-test  $p < 10^{-10}$ ) and for the sequences with high translation  
289 rates than for those with medium translation rates (one-sided Student's t-test  $p < 10^{-14}$ ). This result  
290 demonstrates the link between the total time needed for ribosome transition on a mRNA and density of  
291 *X* motifs along the length of the sequence.

292

293 Fig 6. Number of *X* motifs (per kilobase; density  $d_S(X)$  defined in Equation (1)) for *S. cerevisiae* genes:  
294 1323 genes with low translation rates (estimated translation rate  $< 0.03$ ), 1378 genes with medium  
295 translation rates (estimated translation rate 0.05-0.09) and 1324 genes with high translation rates  
296 (estimated translation rate  $> 1.1$ ). The distributions of the number of *X* motifs identified in the genes are  
297 indicated by boxplots representing the mean number with a  $\pm 0.99$  confidence interval. The statistical  
298 significance is confirmed by two one-sided Student's t-tests with:  $p < 10^{-10}$  between the sequences with  
299 medium translation rates and those with low translation rates; and  $p < 10^{-14}$  between the sequences with  
300 high translation rates and those with medium translation rates.

301

302 To investigate whether *X* motifs might play a role in modulating ribosome speed in specific regions in  
303 mRNA, we considered single protein studies, where local translation elongation rate has been studied  
304 in detail. The first example concerns the study of a gene in *S. cerevisiae*, to investigate the link between  
305 translational elongation and mRNA decay [55]. In this study, various HIS3 protein constructs (length of

306 699 nucleotides) were designed with increasing codon optimality (measured by the CSC index) from  
307 0% to 100%. We identified  $X$  motifs in the different constructs as before and compared them to the  
308 experimentally measured mRNA half-life. As the authors point out, the mRNA half-life is largely  
309 determined by the codon-dependent rate of translational elongation, since mRNAs whose translation  
310 elongation rate is slowed by inclusion of non-optimal codons are specifically degraded. The density of  $X$   
311 motifs ranges from 0 in the 0% optimized construct to more than 7 in the 100% optimized sequence  
312 (Fig 7). The results suggest that the introduction of individual  $X$  motifs in specific regions can be used to  
313 increase the mRNA half-life.

314

315 Fig 7. Histogram of the number of  $X$  motifs (per kilobase; density  $d_S(X)$  defined in Equation (1)) for  
316 different constructs corresponding to the *S. cerevisiae* HIS3 gene with 0-100% optimized codons. The  
317 orange plot indicates the mRNA half-life values corresponding to each construct.

318

319 The second example concerns a *Drosophila* cell-free translation system that was used to directly  
320 compare the rate of mRNA translation elongation for different luciferase constructs with synonymous  
321 substitutions [56]. The OPT construct was designed with the most preferred codons in all positions  
322 except for the first 10 codons, while the dOPT construct had the least preferred codons in all positions.  
323 The N-OPT, M-OPT and C-OPT constructs were created by replacing the N-terminal part (codons 11–  
324 223), middle part (codons 224–423) and C-terminal part (codons 424–550) of the dOPT sequence with  
325 the corresponding optimized sequence, respectively. For each construct, the authors measured the time  
326 when the luminescence signal was first detected after start of translation. The time of first appearance  
327 (TFA) should thus reflect the speed of translation process. Higher TFA values were observed for each  
328 construct in the order dOPT < C-OPT < M-OPT < N-OPT < OPT, correlating well with an increasing  
329 density of  $X$  motifs (Fig 8). These results suggest that the introduction of  $X$  motifs in different regions of  
330 the gene significantly increased the rate of translation elongation, probably by speeding up ribosome  
331 movement on the mRNA.

332

333 Fig 8. Number of  $X$  motifs (per kilobase; density  $d_s(X)$  defined in Equation (1)) in the different constructs  
334 corresponding to the *Drosophila* luciferase gene. Sequence regions shown in blue are codon optimized,  
335 and in red are the wild type sequence. The numbers above the sequences indicate the codon positions  
336 of the optimized regions.

337

338 We have highlighted the potential effects of  $X$  motifs on translation elongation speed, protein folding  
339 and function. The examples selected include studies in very different organisms, including viruses, fungi  
340 and insects with different codon usage bias (codon usage tables for these organisms are provided in S1  
341 Table), but in all the examples a strong correlation is observed between ‘optimal’ codons and  $X$  codons.  
342 Taken together, the results support the idea that the use of  $X$  motifs is a conserved mechanism from  
343 viruses to animals that may participate in the modulation or regulation of the translation elongation  
344 rate along the mRNA.

345

## 346 **Discussion**

347 In this work, we have combined two very distinct research domains: gene translation through the  
348 genetic code and the theory of circular codes which allows two processes simultaneously: reading frame  
349 retrieval and amino acid coding. Our hypothesis is that at least two codes operate in genes: the standard  
350 genetic code, experimentally proved to be functional, and the  $X$  circular code that has been shown to be  
351 statistically enriched in genes. For the first time here, we shed light on a number of biological  
352 experimental results by using the definition of a very simple parameter to analyze the density of  $X$  motifs  
353 in genes, i.e. motifs from the circular code  $X$ .

354 We would first like to make some comments about the mathematical structure of these two codes. The  
355 standard genetic code consists of 60 codons coding for 19 amino acids, the start codon *ATG* that codes  
356 for the amino acid *Met* and establishes the reading frame, and three non-coding stop codons  
357  $\{TAA, TAG, TGA\}$ . The genetic code has a weak mathematical structure: a surjective coding map for the 60  
358 codons and an incomplete self-complementary property for the 60 codons (e.g. the complementary  
359 codon of *TTA* coding the amino acid *Leu* is the stop codon *TAA*) implying a non self-complementary  
360 property for the four start/stop codons. The circular code  $X$  consists of 20 codons coding for 12 amino

361 acids and has a strong mathematical structure: circularity for retrieving the reading frame, a surjective  
362 coding map, a complete self-complementary property for the 20 codons, a  $C^3$  property, etc. (reviewed in  
363 [12-13]).

364 We propose that the theory of circular codes can be used to shed light on many of the observed  
365 phenomena related to optimal codons/dicodons and the effects of codon optimization on different  
366 factors of gene expression, from transcriptional regulation to translation initiation, retrieval of the open  
367 reading frame, translation elongation velocities, and protein folding. We showed that optimal codons at  
368 the species and gene levels correlate well with the 20 codons that define the  $X$  circular code. Importantly,  
369 the optimal codons identified in diverse species [31] that increase translation elongation rates and  
370 mRNA stability are significantly enriched in  $X$  codons. We then studied a number of published  
371 experiments that used recent technologies to perform more detailed investigations of codon usage along  
372 the length of a gene, which suggest that codon context and local clusters of optimal or non-optimal  
373 codons may represent important regulatory signals for translation bursts and pauses [6,57]. In all these  
374 experiments, increased translation efficiency correlates with the number of  $X$  motifs present in the gene  
375 sequences. These observations raise the question: do  $X$  motifs somehow orchestrate elongation rate?  
376 Since it is known that translational elongation rate is intimately connected to mRNA stability, it is also  
377 tempting to suggest that  $X$  motifs are linked to the universal code of codon-mediated mRNA decay  
378 proposed by Chen and Coller [58].

379 The theory of the  $X$  circular code will have practical implications for improving the prediction of gene  
380 expression levels based on the gene sequence. Most of the current codon usage measures are dependent  
381 on the studied organism and the chosen expression system. In contrast, the presence of  $X$  motifs  
382 represents a universal signature that is significantly correlated with increased expression. Our previous  
383 work has already shown that  $X$  motifs can predict functional versus dubious genes in yeast [23] and can  
384 be used for rational gene design [24].

385 Translation of mRNA by the ribosome is a universal mechanism, and the most parsimonious explanation  
386 for the observed correlation between the presence of  $X$  motifs and increased translation elongation rates  
387 is that  $X$  motifs are somehow recognized by the ribosome. It is known that codon usage has effects on  
388 the major steps of translation elongation, including codon-anticodon decoding and peptide bond



389 formation [57], as well as translocation which can be slowed down by mRNA secondary structure  
390 elements, such as pseudoknots and stem-loops [59]. Our hypothesis that *X* motifs in mRNA are  
391 recognized by the ribosome is further supported by recent ribosome profiling experiments in  
392 *Neurospora crassa*, which suggest that codon optimization increases the rate of ribosome movement on  
393 mRNA [60], and by the observation that translation elongation and mRNA stability are coupled through  
394 the ribosomal A-site [61]. Interestingly, our previous work has identified *X* motifs in the anticodon  
395 region of multiple tRNA genes, as well as in important functional regions of the ribosomal rRNA  
396 including the decoding centre [25-27].

397 How could motifs from the *X* circular code work? If the decoding unit at the ribosome is the anticodon  
398 then the comma-free codes would immediately return to the reading phase while the general circular  
399 codes would have a delay associated with reading at most four codons (exactly 13 nucleotides). If the  
400 decoding unit at the ribosome is the anticodon with adjacent nucleotides then the general circular codes  
401 could also immediately return to the reading phase. Does the self-complementary property of the *X*  
402 circular code contribute to coordination between *X* motifs in mRNA and *X* motifs in tRNA and/or rRNA?  
403 So far we have mainly discussed the effects of codon choices on the throughput of translation, but  
404 changes in the translation elongation process can clearly affect translation fidelity and accuracy,  
405 reviewed in [62]. For example, clustering of rare codons could deplete cognate tRNAs, increasing the  
406 probability of a near- or non-cognate tRNA occupying the decoding site, and this probability could be  
407 reflected in the frequency of miss-incorporation. In this case, it has been shown that the standard genetic  
408 code minimizes the impact of the mutations on the translated protein [56]. Clustering of identical rare  
409 codons also increases the probability of a frameshift during translation. Ribosome stalling at *Lys* codons  
410 triggers ribosome sliding on successive *AAA* codons. When ribosomes resume translation, they may shift  
411 in an incorrect reading frame. The ribosomes translating in the -1 or +1 frame usually quickly encounter  
412 out-of-frame stop codons that result in termination. Again, it has been suggested that the genetic code  
413 might be in some way optimized for frameshift mutations [63]. Given the inherent error correcting  
414 properties of circular codes, it is possible that the *X* circular code may play a role in the synchronization  
415 of the correct reading frame.



416 In the future, we hope to show that the simple parameter defined in this work to estimate the coverage  
417 of  $X$  motifs in genes is a useful factor that should be taken into account in codon optimization strategies  
418 or other experimental approaches involving gene expression. We also plan to investigate more complex  
419 parameters linked to  $X$  motifs, such as localized density patterns within specific regions of the genes.

420

## 421 **Materials and Methods**

### 422 **Definition of the $X$ motif density parameter**

423 We define an  $X$  motif  $m_s(X)$  as a series of at least 4 consecutive codons of the circular code  $X$  (defined in  
424 the Introduction) in the reading frame of a gene sequence  $s$ . For example,  $m_s(X) = CAGGACTACGTCGAC$   
425 is an  $X$  motif since  $CAG$ ,  $GAC$ ,  $TAC$  and  $GTC$  are codons of  $X$ . It is important to remember that any  $X$  motif  
426 with at least 4 consecutive  $X$  codons always allows the reading frame to be retrieved. Let  $N(m_s(X))$  be  
427 the number of  $X$  motifs  $m_s(X)$  in a gene sequence  $s$  of nucleotide length  $l_s$ . Then the density  $d_s(X)$  of  $X$   
428 motifs in a gene sequence  $s$  is defined by the number of  $X$  motifs per kilobase in  $s$ , i.e.

429

$$430 \quad d_s(X) = 1000 \frac{N(m_s(X))}{l_s}.$$

431 This density  $d_s(X)$  in a sequence  $s$  can easily be extended to a density  $d_{\mathcal{S}}(X)$  in a set  $\mathcal{S}$  of gene sequences  
432  $s$  by dividing the total number of  $X$  motifs with the total nucleotide length, i.e.

$$d_{\mathcal{S}}(X) = 1000 \frac{\sum_{s \in \mathcal{S}} N(m_s(X))}{\sum_{s \in \mathcal{S}} l_s}. \quad (1)$$

433 These densities  $d_s(X)$  and  $d_{\mathcal{S}}(X)$  are normalized parameters allowing to compare the coverage of  $X$   
434 motifs in sequences of different lengths and in sequence populations of different sizes.

435 In order to evaluate the statistical significance of the obtained results, we also define 100 random codes  
436  $R$  with similar properties to the  $X$  circular code, using the method described in Dila et al. (2019a). We  
437 then identified  $R$  random motifs  $m_s(R)$  from these codes in the gene sequences and calculated the  
438 densities  $d_s(R)$  and  $d_{\mathcal{S}}(R)$  of  $R$  motifs, as for the  $X$  motifs.

439

#### 440 **Data sources for analysis of optimal codons**

441 As a measure of the optimality of each codon, we used the codon stabilization coefficient (CSC), defined  
442 by [31] as the Pearson correlation coefficient between the occurrence of each codon and the half-life of  
443 each mRNA. Thus, codons found more frequently in genes with longer mRNA half-lives have higher CSC  
444 values. The 61 coding codons can then be ranked according to their CSC scores in different organisms.  
445 We obtained the CSC rankings for each codon from previous studies in four species: zebrafish ([31],  
446 *Xenopus* [31], *Drosophila* [64] and *S. cerevisiae* [32]. We then calculated the mean CSC ranking for each  
447 codon in these four species.

448 Dicodons associated with reduced protein expression in *S. cerevisiae* were taken from a previous study  
449 [33]. Dicodons associated with low abundance or high abundance proteins were obtained from a  
450 previous study [34].

451

#### 452 **Minimal gene set analysis**

453 The minimal gene set of 81 genes conserved in all species was obtained from a previous study [40]. We  
454 used the *Mycoplasma genitalium* genes provided in the original study as a query, and searched for  
455 orthologues in the reference set of complete genomes for 317 species (144 eukaryotes, 142 bacteria and  
456 31 archaea) in the OrthoInspector 3.0 database [65]. This resulted in a set of 15822 protein sequences  
457 (5503 eukaryotes, 9205 bacteria and 1114 archaea). For each protein sequence, we retrieved the mRNA  
458 sequences from the Uniprot database ([www.uniprot.org](http://www.uniprot.org)) and identified all *X* motifs in the reading frame  
459 with a minimum length of 4 codons, using in-house developed software.

460

#### 461 **Data sources for codon-optimized genes**

462 Experimental data for synthetic genes re-designed for optimized protein expression were obtained from  
463 the SGDB database [66]. SGDB contains sequences and associated experimental information for  
464 synthetic (artificially engineered) genes from published peer-reviewed studies. We selected the gene  
465 entries where the synthetic sequence contained only synonymous codon changes, and where  
466 experimental protein expression levels were available for both the wild type and the synthetic gene.

467 This resulted in a set of 45 gene pairs (wild type and synthetic gene), for which we identified all *X* motifs  
468 in the reading frame with a minimum length of 4 codons, using in-house developed software as before.

469

#### 470 **Estimation of translation rates based on ribosome profiling data**

471 Computational estimations of translation rates for 5450 *S. cerevisiae* genes were obtained from a  
472 previous study [54]. The authors performed a simulation of translation based on the totally asymmetric  
473 simple exclusion process (TASEP) model, using experimental measurements of the number of  
474 ribosomes on each transcript as well as RNA copy numbers to calibrate the parameters. For each of the  
475 5450 gene sequences, we identified the *X* motifs using in-house developed software.

476

#### 477 **Acknowledgements**

478 This work was supported by Institute funds from the French Centre National de la Recherche  
479 Scientifique and the University of Strasbourg. The authors would like to thank the BISTRO and BICS  
480 Bioinformatics Platforms for their assistance. This work was supported by French Infrastructure  
481 Institut Français de Bioinformatique (IFB) ANR-11-INBS-0013, and the ANR Grants Elixir-Excelsior:  
482 GA-676559 and RAINRARE: ANR-18-RAR3-0006-02.

483 **References**

- 484 1. Crick FH, Barnett L, Brenner S, Watts-Tobin RJ. General nature of the genetic code for proteins.  
485 Nature. 1961;192: 1227–1232.
- 486 2. Eslami-Mossallam B, Schram RD, Tompitak M, van Noort J, Schiessel H. Multiplexing genetic and  
487 nucleosome positioning codes: A computational approach. PLoS One. 2016;11: e0156905.
- 488 3. Prakash K, Fournier D. Evidence for the implication of the histone code in building the genome  
489 structure. Biosystems. 2018;164: 49-59.
- 490 4. Baralle M, Baralle FE. The splicing code. Biosystems. 2018;164: 39-48.
- 491 5. Cakiroglu SA, Zaugg JB, Luscombe NM. Backmasking in the yeast genome: encoding overlapping  
492 information for protein-coding and RNA degradation. Nucleic Acids Research. 2016;44: 8065-8072.
- 493 6. Yu CH, Dang Y, Zhou Z, Wu C, Zhao F, Sachs MS, Liu Y. Codon usage influences the local rate of  
494 translation elongation to regulate co-translational protein folding. Mol Cell. 2015;59: 744-754.
- 495 7. Weatheritt RJ, Babu MM. Evolution. The hidden codes that shape protein evolution. Science.  
496 2013;342: 1325-1326.
- 497 8. Maraia RJ, Iben JR. Different types of secondary information in the genetic code. RNA. 2014;20: 977-  
498 984.
- 499 9. Bergman S, Tuller T. Widespread non-modular overlapping codes in the coding regions. Physical  
500 Biology. 2020;1088: 1478-3975/ab7083.
- 501 10. Babbitt GA, Coppola EE, Mortensen JS, Ekeren PX, Viola C, Goldblatt D, Hudson AO. Triplet-based  
502 codon organization optimizes the impact of synonymous mutation on nucleic acid molecular  
503 dynamics. Journal Molecular Evolution. 2018;86: 91-102.
- 504 11. Arquès DG, Michel CJ. A complementary circular code in the protein coding genes. Journal of  
505 Theoretical Biology. 1996;182: 45-58.
- 506 12. Michel CJ. A 2006 review of circular codes in genes. Computer and Mathematics with Applications  
507 2008;55: 984-988.
- 508 13. Fimmel E, Strüngmann L. Mathematical fundamentals for the noise immunity of the genetic code.  
509 Biosystems 2018;164: 86-198.
- 510 14. Crick FH, Griffith JS, Orgel LE. Codes without commas. Proceedings of the National Academy of  
511 Sciences USA. 1957;43: 416-421.
- 512 15. Nirenberg MW, Matthaei JH. The dependence of cell-free protein synthesis in E. coli upon naturally  
513 occurring or synthetic polyribonucleotides. Proceedings of the National Academy of Sciences USA.  
514 1961;47: 1588-1602.
- 515 16. Michel CJ. The maximal  $C^3$  self-complementary trinucleotide circular code  $X$  in genes of bacteria,  
516 archaea, eukaryotes, plasmids and viruses. Life. 2017;7: 20.
- 517 17. Frey G, Michel CJ. Circular codes in archaeal genomes. Journal of Theoretical Biology 2003;223: 413-  
518 431.

- 519 18. Frey G, Michel CJ. Identification of circular codes in bacterial genomes and their use in a  
520 factorization method for retrieving the reading frames of genes. *Computational Biology and*  
521 *Chemistry* 2006;30: 87-101.
- 522 19. Grosjean H, Westhof E. An integrated, structure- and energy-based view of the genetic code. *Nucleic*  
523 *Acids Research*. 2016;44: 8020-8040.
- 524 20. Michel CJ, Thompson JD. Identification of a circular code periodicity in the bacterial ribosome: origin  
525 of codon periodicity in genes? *RNA Biology*. 2020;17: 571-583.
- 526 21. Fimmel E, Michel CJ, Pirot F, Sereni J-S, Strüngmann L. Mixed circular codes. *Mathematical*  
527 *Biosciences* 2019;317: 108231.
- 528 22. El Soufi K, Michel CJ. Circular code motifs in genomes of eukaryotes. *Journal of Theoretical Biology*.  
529 2016;408: 198-212.
- 530 23. Michel CJ, Ngoune VN, Poch O, Ripp R, Thompson JD. Enrichment of circular code motifs in the genes  
531 of the yeast *Saccharomyces cerevisiae*. *Life*. 2017;7.
- 532 24. Dila G, Michel CJ, Poch O, Ripp R, Thompson JD. Evolutionary conservation and functional  
533 implications of circular code motifs in eukaryotic genomes. *Biosystems*. 2019a;175: 57-74.
- 534 25. Michel CJ. Circular code motifs in transfer RNAs. *Computational Biology and Chemistry*. 2013;45:  
535 17-29.
- 536 26. Michel CJ. Circular code motifs in transfer and 16S ribosomal RNAs: a possible translation code in  
537 genes. *Computational Biology and Chemistry*. 2012;37: 24-37.
- 538 27. Dila G, Ripp R, Mayer C, Poch O, Michel CJ, Thompson JD. Circular code motifs in the ribosome: a  
539 missing link in the evolution of translation? *RNA* 2019b;25: 1714–1730.
- 540 28. Demongeot J, Seligmann H. Spontaneous evolution of circular codes in theoretical minimal RNA  
541 rings. *Gene* 2019a;705: 95-102.
- 542 29. Demongeot J, Moreira A. A possible circular RNA at the origin of life. *Journal of Theoretical Biology*.  
543 2007;249: 314-324.
- 544 30. Demongeot J, Seligmann H. The uroboros theory of life's origin: 22-nucleotide theoretical minimal  
545 RNA rings reflect evolution of genetic code and tRNA-rRNA translation machineries. *Acta*  
546 *Biotheoretica*. 2019b;67: 273-297.
- 547 31. Bazzini AA, Del Viso F, Moreno-Mateos MA, Johnstone TG, Vejnar CE, Qin Y, Yao J, Khokha MK,  
548 Giraldez AJ. Codon identity regulates mRNA stability and translation efficiency during the maternal-  
549 to-zygotic transition. *EMBO Journal*. 2016;35: 2087-2103.
- 550 32. Hanson G, Collier J. Codon optimality, bias and usage in translation and mRNA decay. *Nature Reviews*  
551 *Molecular Cell Biology* 2018;19: 20-30.
- 552 33. Gamble CE, Brule CE, Dean KM, Fields S, Grayhack EJ. Adjacent codons act in concert to modulate  
553 translation efficiency in yeast. *Cell*. 2016;166: 679-690.
- 554 34. Diambra LA. Differential bicodon usage in lowly and highly abundant proteins. *PeerJ*. 2017;5:  
555 e3081.

- 556 35. Guo FB, Ye YN, Zhao HL, Lin D, Wei W. Universal pattern and diverse strengths of successive  
557 synonymous codon bias in three domains of life, particularly among prokaryotic genomes. *DNA*  
558 *Research*. 2012;19: 477-485.
- 559 36. Clarke TF, Clark PL. Rare codons cluster. *PLoS One*. 2008;3: e3412.
- 560 37. Brar GA. Beyond the triplet code: Context cues transform translation. *Cell*. 2016;167: 1681-1692.
- 561 38. Chevance FFV, Hughes KT. Case for the genetic code as a triplet of triplets. *Proceedings of the*  
562 *National Academy of Sciences USA*. 2017;114: 4745-4750.
- 563 39. Sharma AK, Sormanni P, Ahmed N, Ciryam P, Friedrich UA, Kramer G, O'Brien EP. A chemical kinetic  
564 basis for measuring translation initiation and elongation rates from ribosome profiling data. *PLOS*  
565 *Computational Biology*. 2019;15: e1007070.
- 566 40. Koonin EV. How many genes can make a cell: the minimal-gene-set concept. *Annual Review of*  
567 *Genomics and Human Genetics*. 2000;1: 99-116.
- 568 41. Leder C, Kleinschmidt JA, Wiethe C, Müller M. Enhancement of capsid gene expression: Preparing  
569 the human papillomavirus type 16 major structural gene L1 for DNA vaccination purposes. *Journal*  
570 *of Virology*. 2001;75: 9201-9209.
- 571 42. Warzecha H, Mason HS, Lane C, Tryggvesson A, Rybicki E, Williamson AL, Clements JD, Rose RC.  
572 Oral immunogenicity of human papillomavirus-like particles expressed in potato. *Journal of*  
573 *Virology*. 2003;77: 8702-8711.
- 574 43. Jack BR, Boutz DR, Paff ML, Smith BL, Bull JJ, Wilke CO. Reduced protein expression in a virus  
575 attenuated by codon deoptimization. *G3 (Bethesda)*. 2017;7: 2957-2968.
- 576 44. Bull JJ, Molineux IJ, Wilke CO. Slow fitness recovery in a codon-modified viral genome. *Molecular*  
577 *Biology Evolution*. 2012;29:2997-3004.
- 578 45. Gingold H, Pilpel Y. Determinants of translation efficiency and accuracy. *Molecular Systems Biology*.  
579 2011;7: 481.
- 580 46. Zhou M, Guo J, Cha J, Chae M, Chen S, Barral JM, Sachs MS, Liu Y. Non-optimal codon usage affects  
581 expression, structure and function of FRQ clock protein *Nature*. 2013;495: 111-115.
- 582 47. Charneski CA, Hurst LD. Positively charged residues are the major determinants of ribosomal  
583 velocity. *PLoS Biology*. 2013;11: e1001508.
- 584 48. Gardin J, Yeasmin R, Yurovsky A, Cai Y, Skiena S, Fitcher B. Measurement of average decoding rates  
585 of the 61 sense codons in vivo. *Elife*. 2014;3.
- 586 49. Weinberg DE, Shah P, Eichhorn SW, Hussmann JA, Plotkin JB, Bartel DP. Improved ribosome-  
587 footprint and mRNA measurements provide insights into dynamics and regulation of yeast  
588 translation. *Cell Rep*. 2016;14: 1787-1799.
- 589 50. Wu CC, Zinshteyn B, Wehner KA, Green R. High-resolution ribosome profiling defines discrete  
590 ribosome elongation states and translational regulation during cellular stress. *Molecular Cell*.  
591 2019;73: 959-970.e5.

- 592 51. Brule CE, Grayhack EJ. Synonymous codons: Choose wisely for expression. *Trends in Genetics*.  
593 2017;33: 283-297.
- 594 52. Villada JC, Brustolini OJB, Batista da Silveira W. Integrated analysis of individual codon contribution  
595 to protein biosynthesis reveals a new approach to improving the basis of rational gene design. *DNA*  
596 *Research*. 2017;24: 419-434.
- 597 53. Mignon C, Mariano N, Stadthagen G, Lugari A, Lagoutte P, Donnat S, Chenavas S, Perot C, Sodoyer R,  
598 Werle B. Codon harmonization - going beyond the speed limit for protein expression. *FEBS Letters*.  
599 2018;592: 1554-1564.
- 600 54. Diamant A, Feldman A, Schochet E, Kupiec M, Arava Y, Tuller T. The extent of ribosome queuing in  
601 budding yeast. *PLOS Computational Biology*. 2018;14: e1005951.
- 602 55. Boël G, Letso R, Neely H, Price WN, Wong KH, Su M, Luff J, Valecha M, Everett JK, Acton TB, Xiao R,  
603 Montelione GT, Aalberts DP, Hunt JF. Codon influence on protein expression in *E. coli* correlates  
604 with mRNA levels. *Nature*. 2016;529: 358-363.
- 605 56. Błażej P, Wnętrzak M, Mackiewicz D, Mackiewicz P. Optimization of the standard genetic code  
606 according to three codon positions using an evolutionary algorithm. *PloS one*. 2018;13: e0201715.
- 607 57. Rodnina MV. The ribosome in action: Tuning of translational efficiency and protein folding. *Protein*  
608 *Science*. 2016;25: 1390-1406.
- 609 58. Chen YH, Collier J. A universal code for mRNA stability? *Trends in Genetics*. 2016;32:687-688.
- 610 59. Wu B, Zhang H, Sun R, Peng S, Cooperman BS, Goldman YE, Chen C. Translocation kinetics and  
611 structural dynamics of ribosomes are modulated by the conformational plasticity of downstream  
612 pseudoknots. *Nucleic Acids Research*. 2018;46: 9736-9748.
- 613 60. Zhou Z, Dang Y, Zhou M, Li L, Yu CH, Fu J, Chen S, and Liu Y. Codon usage is an important  
614 determinant of gene expression levels largely through its effects on transcription *Proceedings of*  
615 *the National Academy of Sciences USA*. 2016;113: E6117-E6125.
- 616 61. Hanson G, Alhusaini N, Morris N, Sweet T, Collier J. Translation elongation and mRNA stability are  
617 coupled through the ribosomal A-site. *RNA*. 2018;24: 1377-1389.
- 618 62. Liu Y, Sharp J.S, Do DH, Kahn RA, Schwalbe H, Buhr F, Prestegard JH. Mistakes in translation:  
619 Reflections on mechanism. *PLoS One*. 2017;12: e0180566.
- 620 63. Geyer R, Madany Mamlouk A. On the efficiency of the genetic code after frameshift mutations. *PeerJ*.  
621 2018;6: e4825.
- 622 64. Burow D.A, Martin S, Quail J.F, Alhusaini N, Collier J, Cleary MD. Attenuated codon optimality  
623 contributes to neural-specific mRNA decay in *drosophila*. *Cell Reports*. 2018;24: 1704-1712.
- 624 65. Nevers Y, Kress A, Defosset A, Ripp R, Linard B, Thompson JD, Poch O, Lecompte O. OrthoInspector  
625 3.0: open portal for comparative genomics. *Nucleic Acids Research*. 2019;47: D411-D418.
- 626 66. Wu G, Zheng Y, Qureshi I, Zin H.T, Beck T, Bulka B, Freeland SJ. SGDB: a database of synthetic genes  
627 re-designed for optimizing protein over-expression. *Nucleic Acids Research*. 2007;35: D76-D79.
- 628



629           **Supporting information captions**

630   S1 Fig. *X* motifs in the wild type and codon-optimized sequences from the SGDB database. **A.** L1h gene  
631   from human papillomavirus. **B.** L1s gene from human papillomavirus. The *X* motifs in the wild type  
632   sequence are shown in blue, and in the codon optimized sequences in red.

633

634   S1 Table. Codon usage tables for the species used in the different studies described in the main text. Data  
635   are from the HIVE-CUTS database at <https://hive.biochemistry.gwu.edu/>. *X* codons are highlighted in  
636   blue.



bioRxiv preprint doi: <https://doi.org/10.1101/2020.03.23.003251>; this version posted March 23, 2020. The copyright holder for this preprint (which was not certified by peer review) is the author/funder, who has granted bioRxiv a license to display the preprint in perpetuity. It is made available under aCC-BY 4.0 International license.

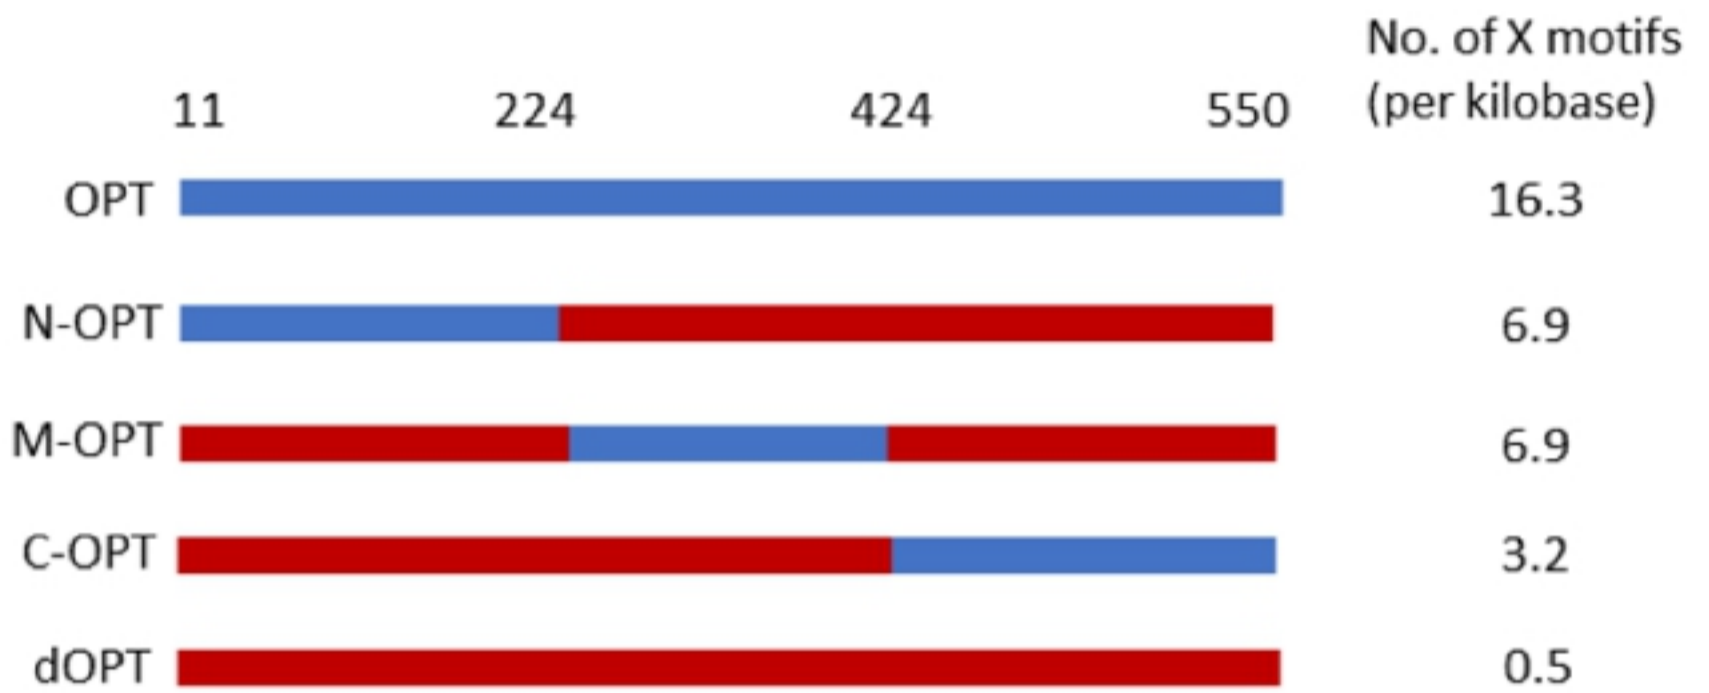

figure 8

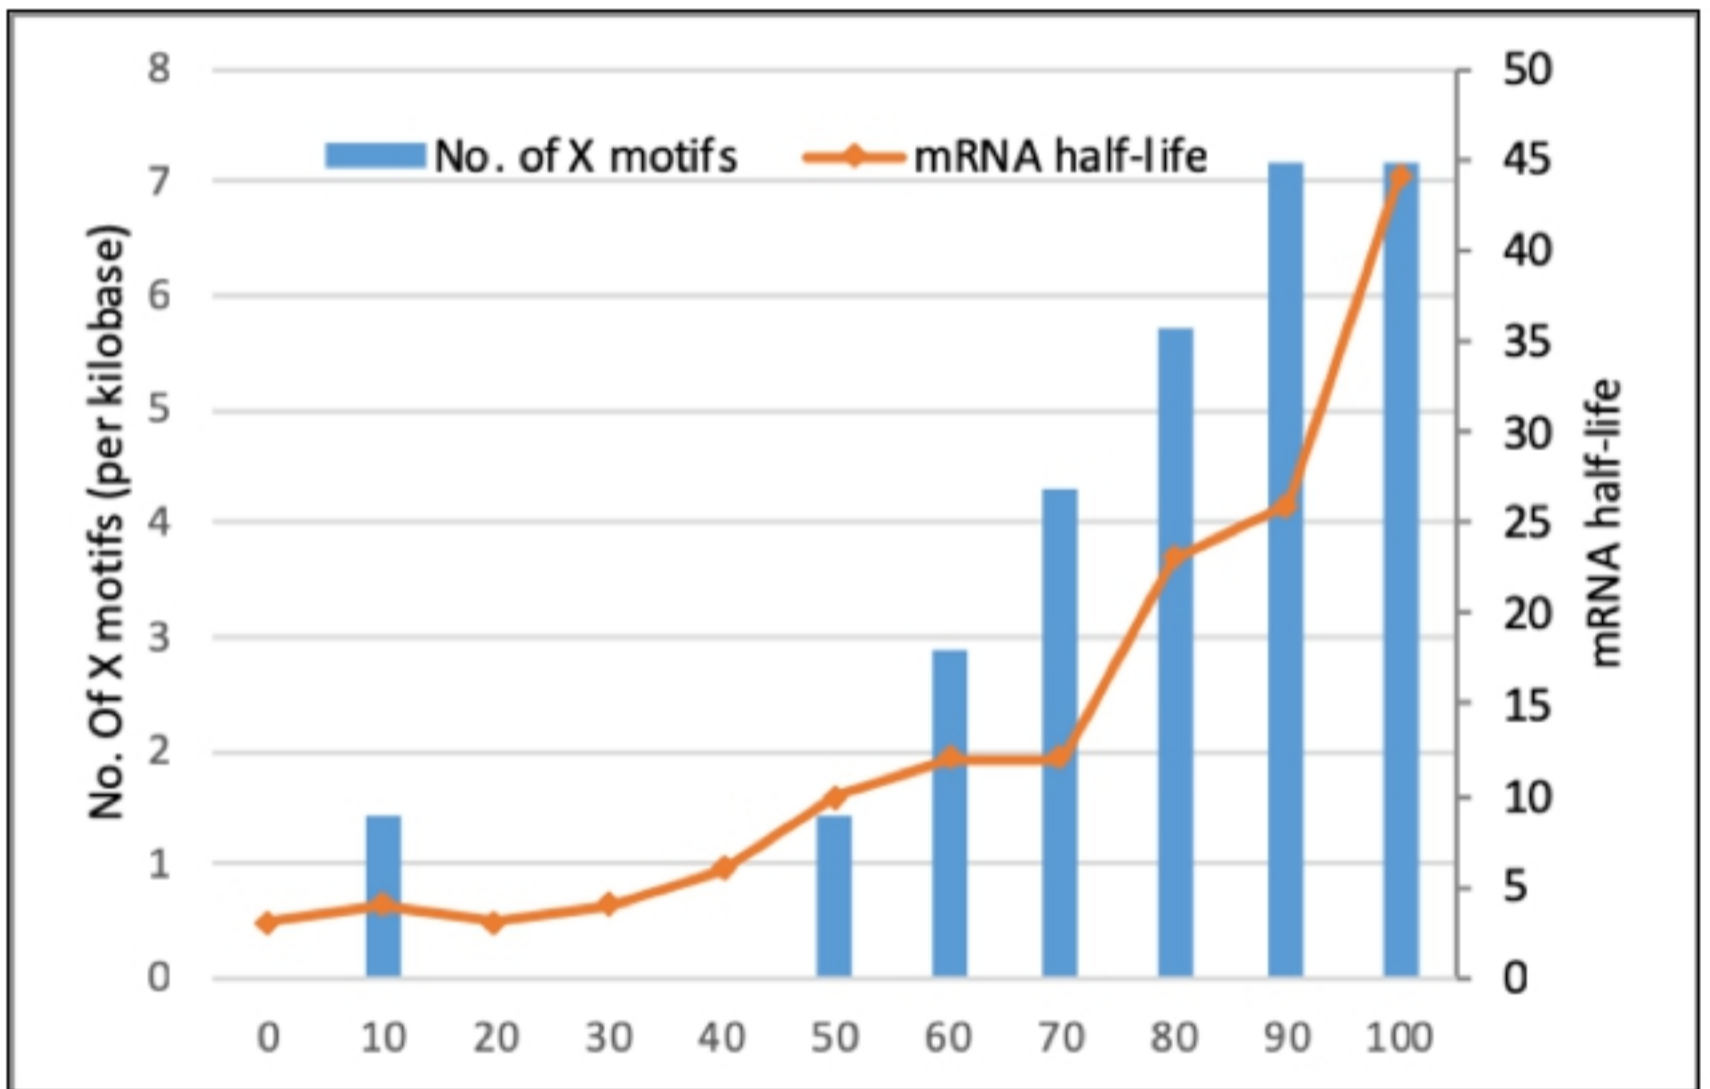

figure 7

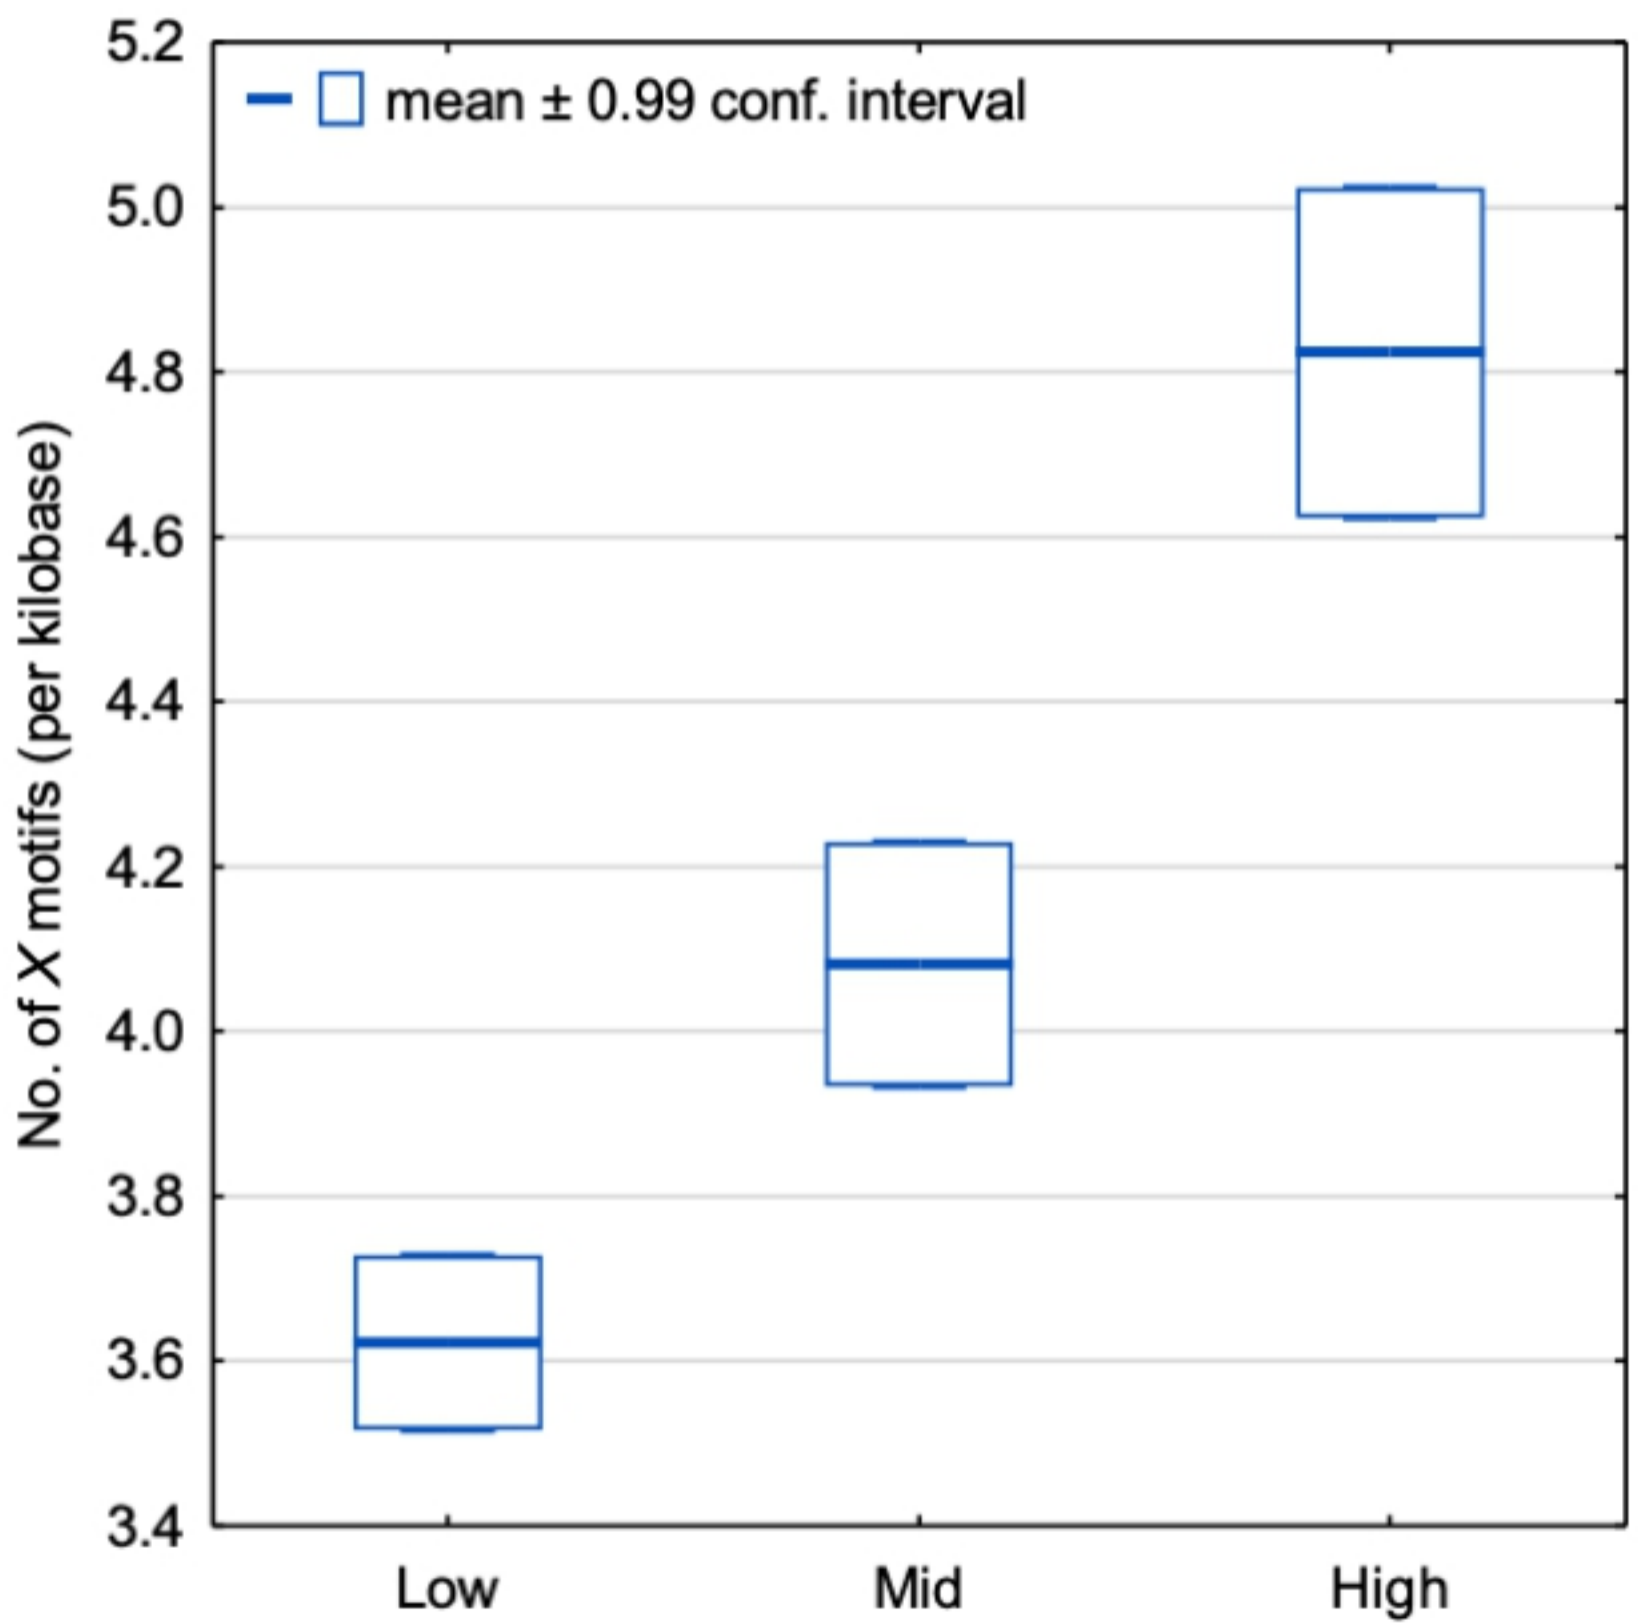

figure 6

bioRxiv preprint doi: <https://doi.org/10.1101/2020.03.23.003251>; this version posted March 23, 2020. The copyright holder for this preprint (which was not certified by peer review) is the author/funder, who has granted bioRxiv a license to display the preprint in perpetuity. It is made available under aCC-BY 4.0 International license.

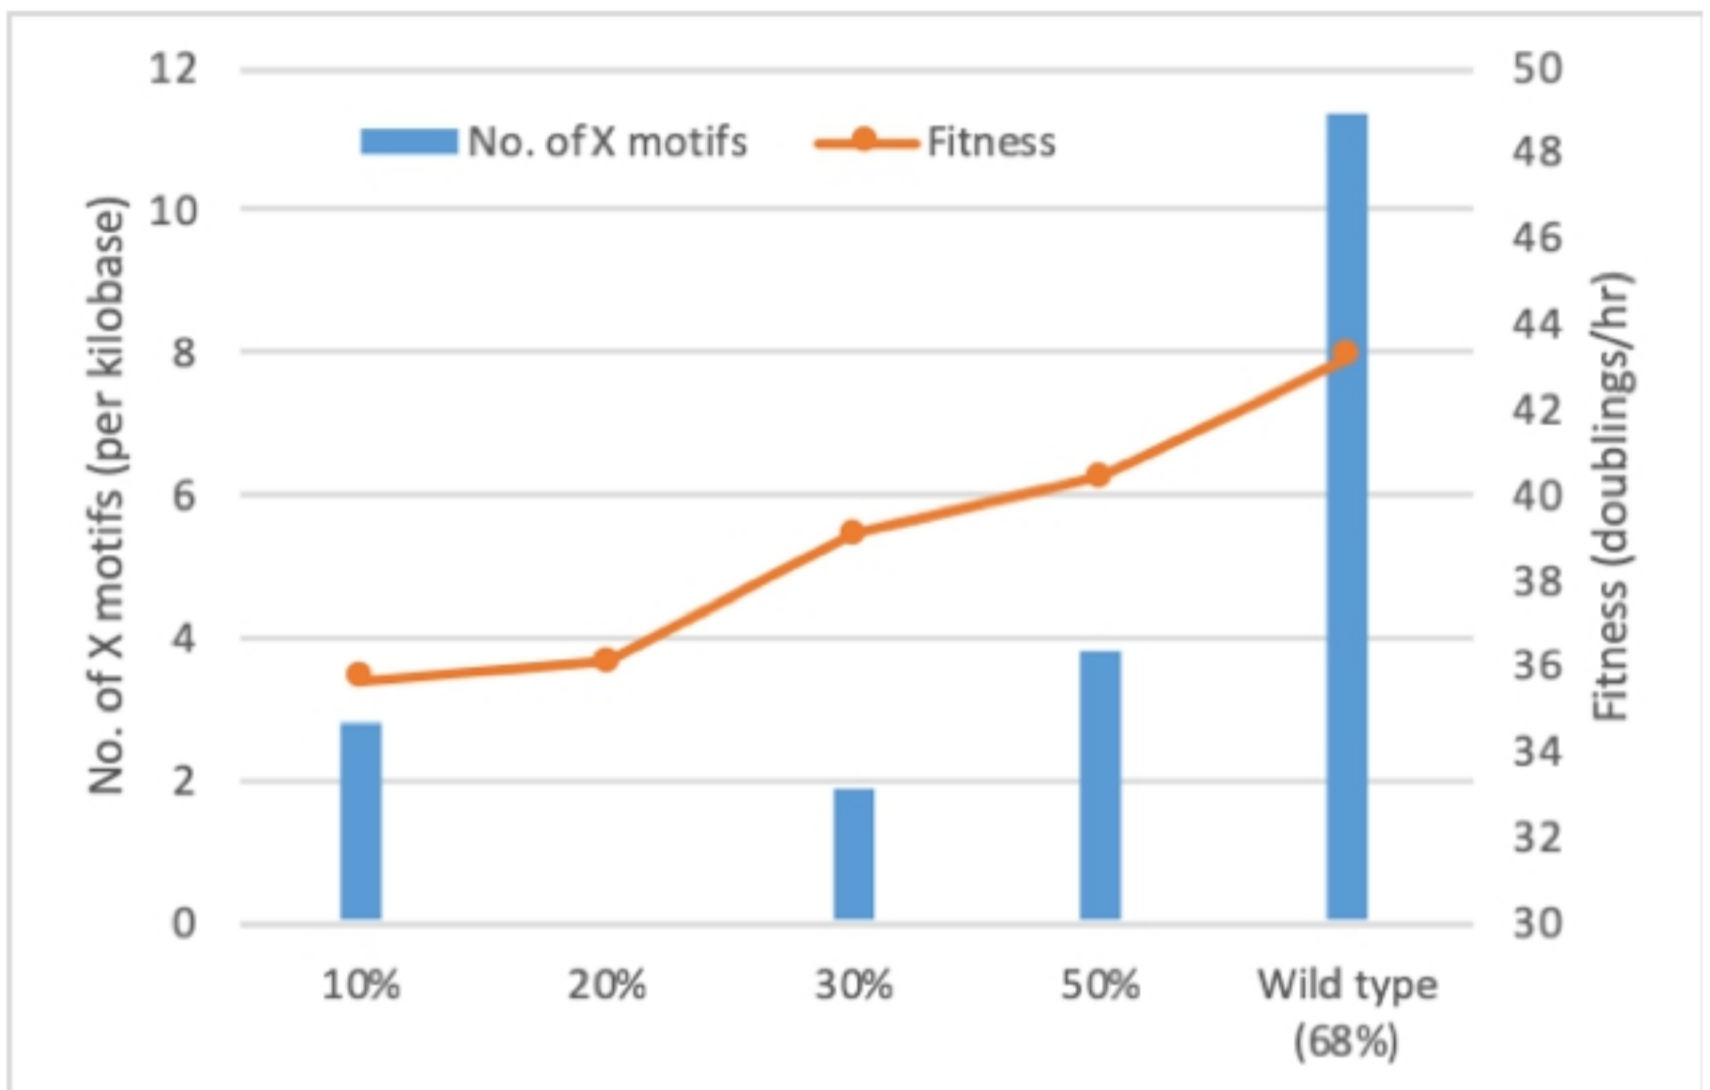

figure 5

bioRxiv preprint doi: <https://doi.org/10.1101/2020.03.23.003251>; this version posted March 23, 2020. The copyright holder for this preprint (which was not certified by peer review) is the author/funder, who has granted bioRxiv a license to display the preprint in perpetuity. It is made available under aCC-BY 4.0 International license.

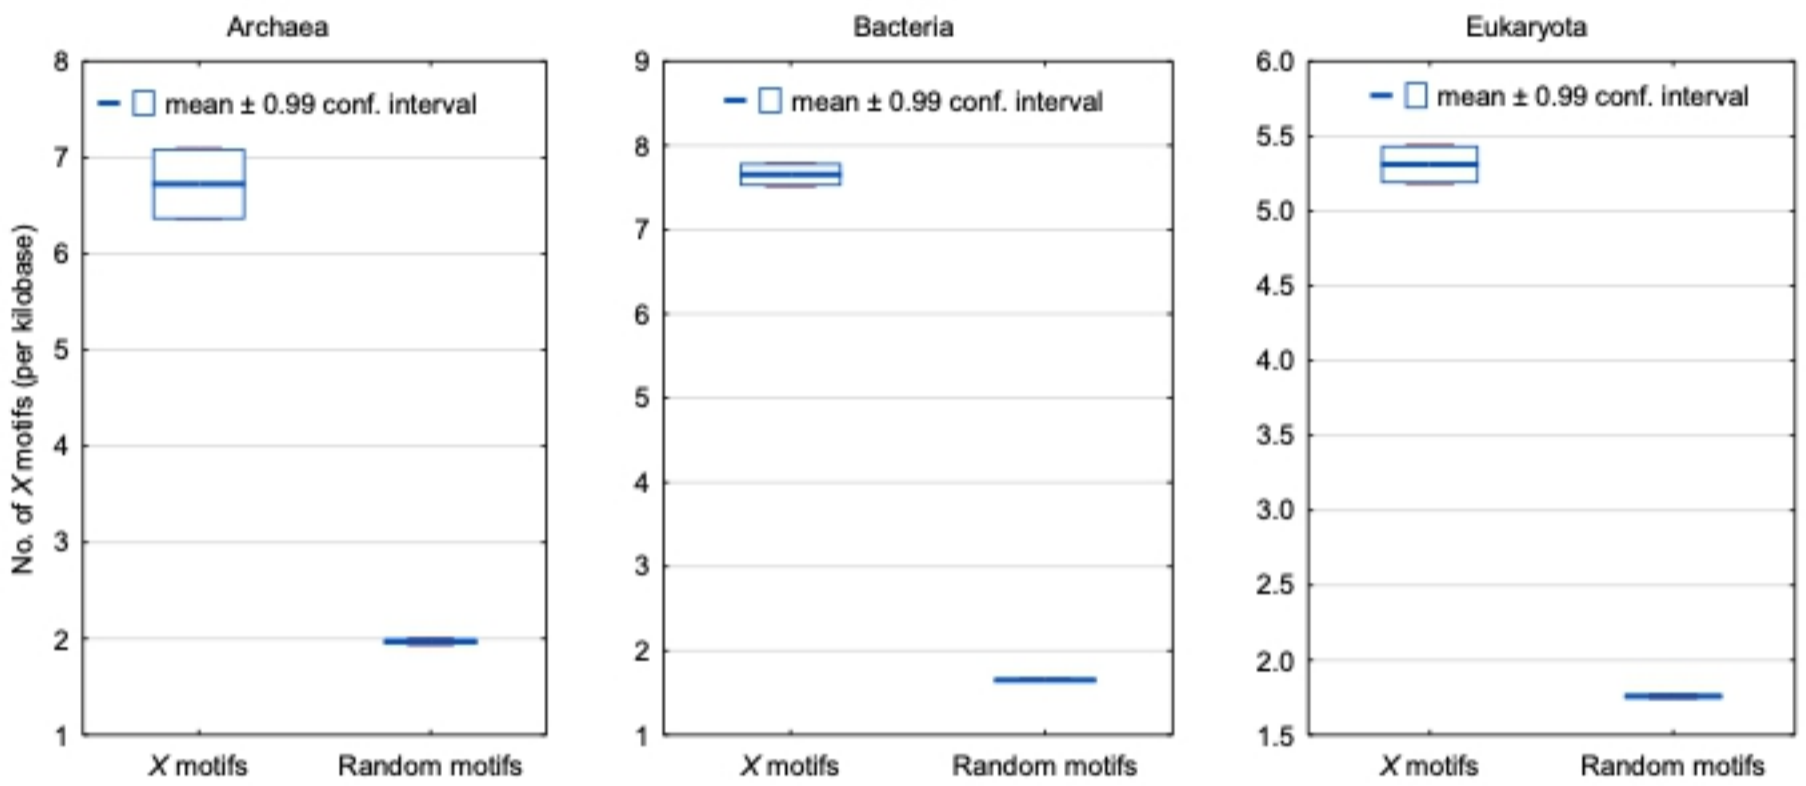

figure 4

$f_0$     **ATG**    ...    **G G T**    **A A T**    **T A C**    **G A G**    ...    **TAA**

$f_1$     **ATG**    ...    G    **G T A**    **A T T**    **A C G**    A G    ...    **TAA**

$f_2$     **ATG**    ...    G G    **T A A**    **T T A**    **C G A**    G    ...    **TAA**

bioRxiv preprint doi: <https://doi.org/10.1101/2020.03.23.003251>; this version posted March 23, 2020. The copyright holder for this preprint (which was not certified by peer review) is the author/funder, who has granted bioRxiv a license to display the preprint in perpetuity. It is made available under aCC-BY 4.0 International license.

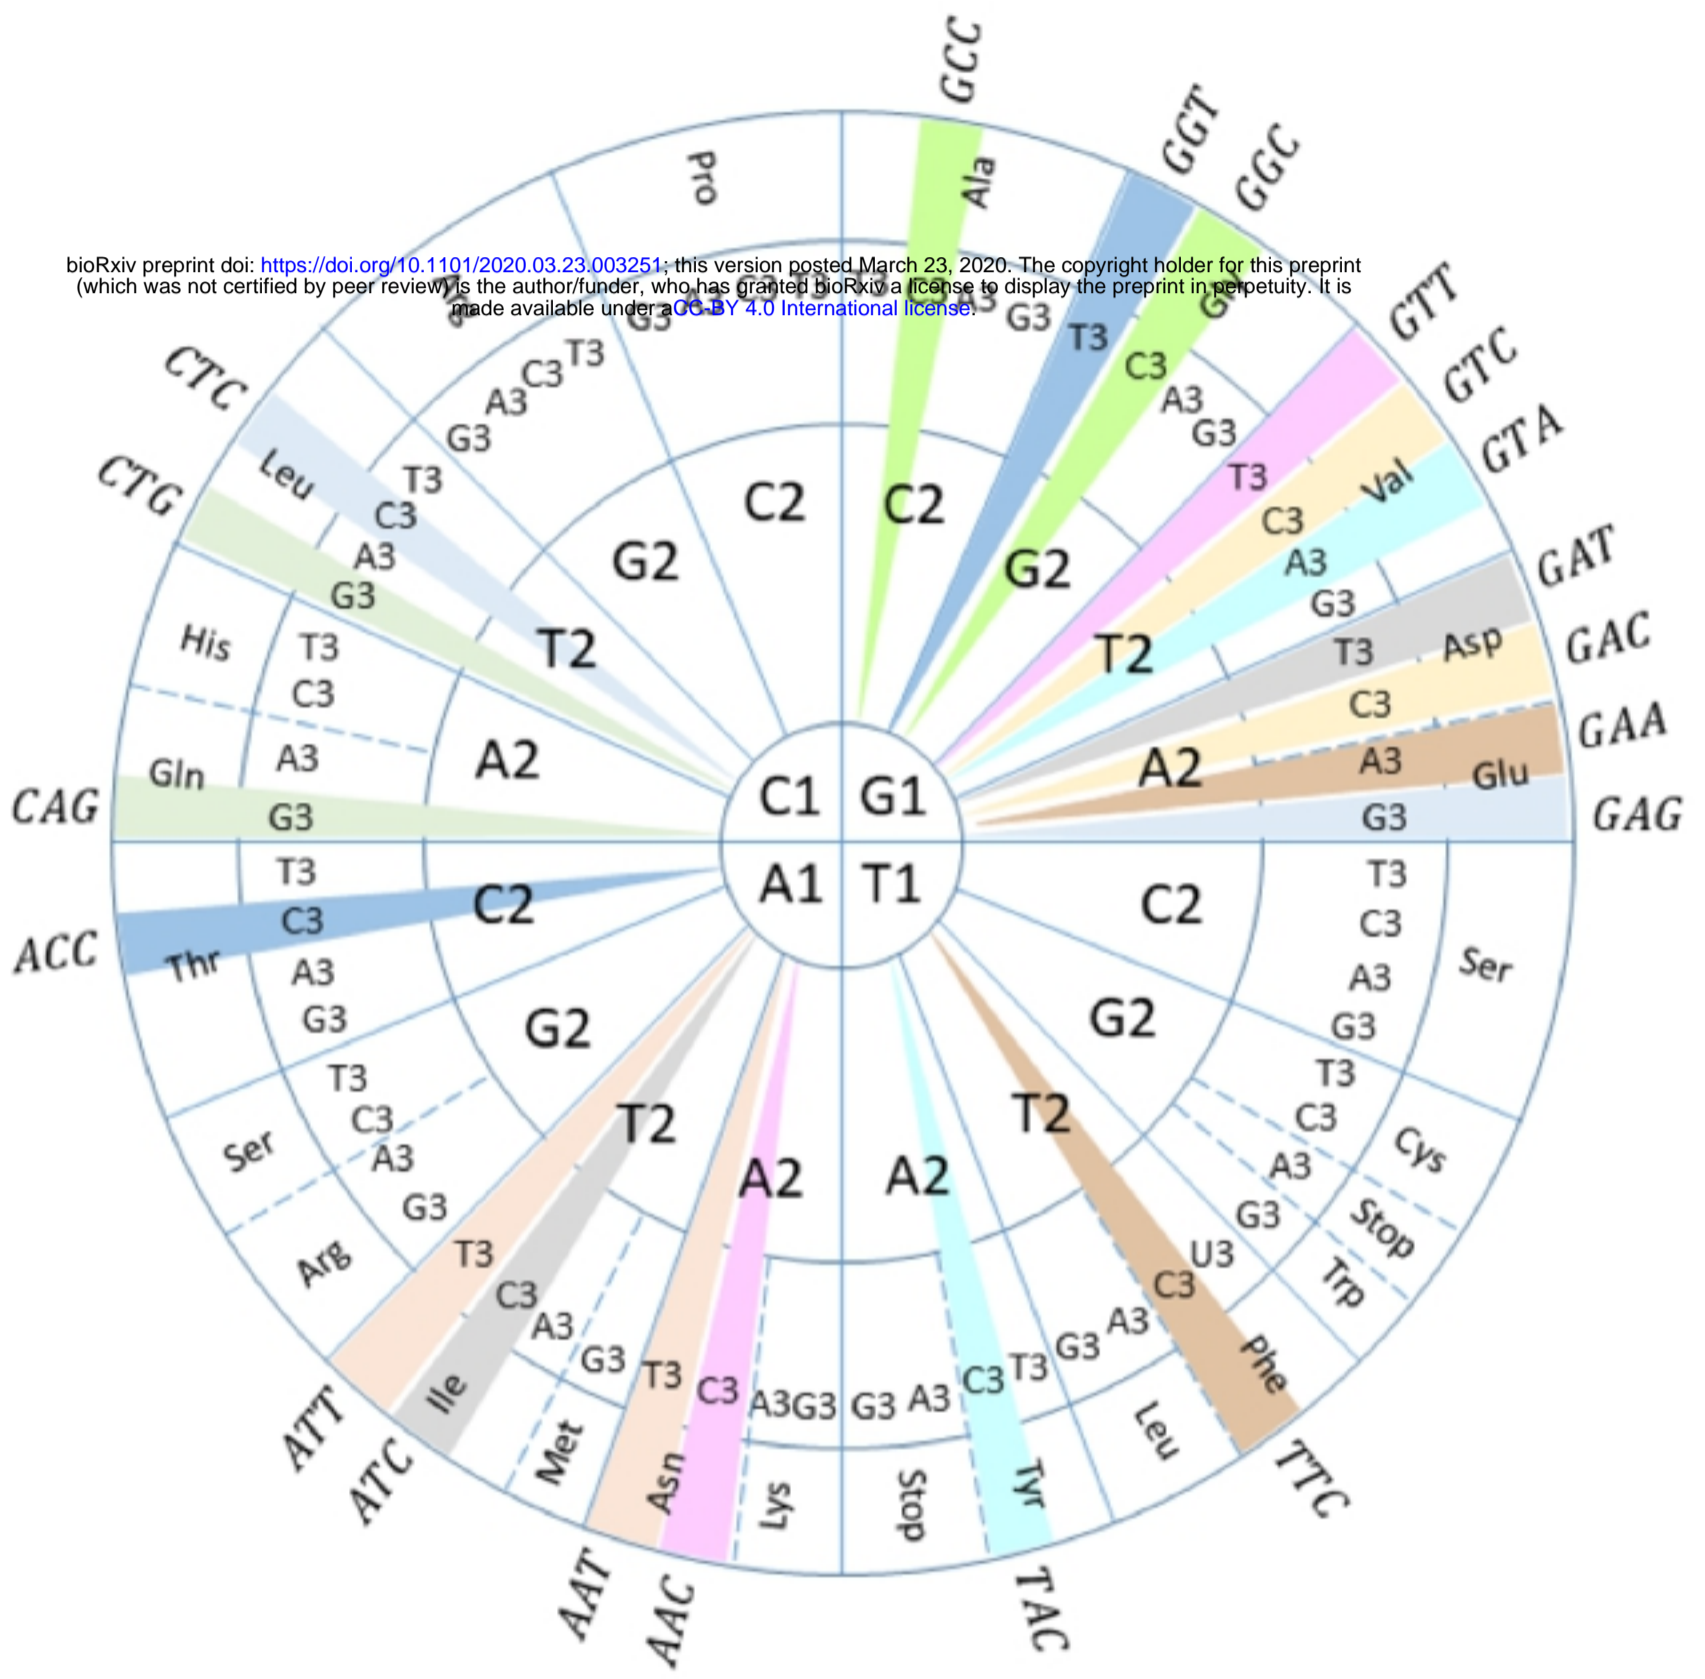

figure 1

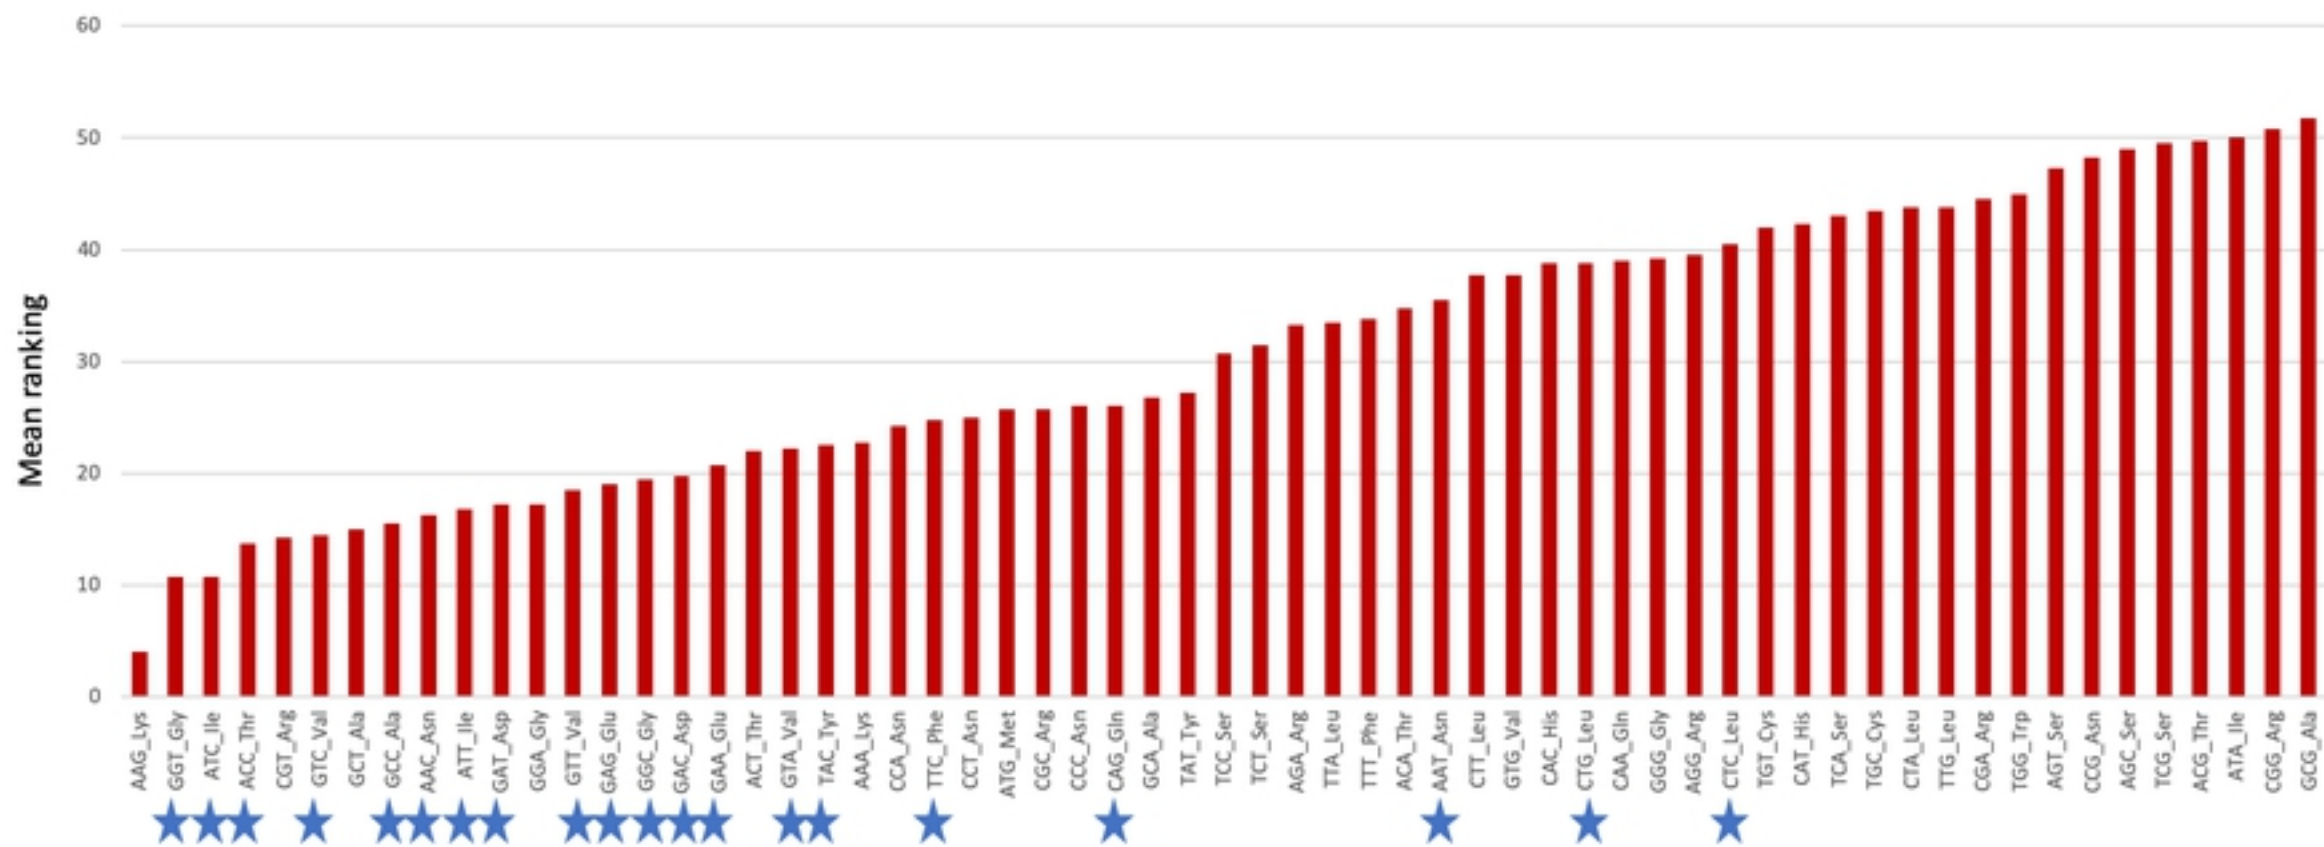

figure 3
